# Supplementary material for: Quality Improvement Spillovers: Evidence from the Hospital Readmissions Reduction Program
Source: Atypon-hosted journal article supplement (doi:10.1287/mnsc.2023.01062), 2024-10-24
Supplement: mnsc.2023.01062.sm1.pdf [file mnsc.2023.01062.sm1.pdf]

# Appendix

**Figure A1 Definition of the Hospitalization Sample from the NRD**

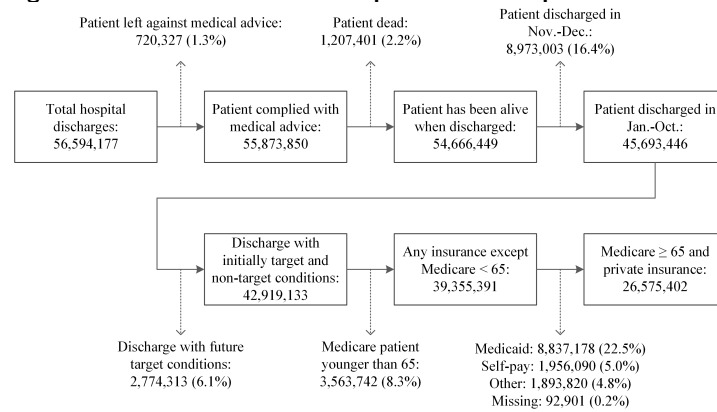

**Table A1 Control Variables**

| Variable                                                    | Description                                                                                                                                                                                                                                                                                              |
|-------------------------------------------------------------|----------------------------------------------------------------------------------------------------------------------------------------------------------------------------------------------------------------------------------------------------------------------------------------------------------|
| <u>Patient controls</u>                                     |                                                                                                                                                                                                                                                                                                          |
| Age                                                         | Categorical variable<br>(0, 1-17, 18-44, 45-64, 65-74, 75-89, 90+)                                                                                                                                                                                                                                       |
| Gender                                                      | Categorical variable<br>(female, male)                                                                                                                                                                                                                                                                   |
| Location                                                    | Categorical variable for population in county of residence<br>(central counties of areas of $\geq 1m$ population, fringe counties of areas of $\geq 1m$ population, metro areas of 250,000-999,999 population, metro areas of 50,000-249,999 population, micropolitan, not metropolitan or micropolitan) |
| Resident                                                    | Indicator variable for residence of the patient in the same state as the hospital                                                                                                                                                                                                                        |
| Income                                                      | Median household income quartiles for patient's ZIP code                                                                                                                                                                                                                                                 |
| <u>Hospital controls</u>                                    |                                                                                                                                                                                                                                                                                                          |
| Volume                                                      | Size of hospitals based on the number of annual discharges<br>(small, medium, large based on the 33rd and 66th percentile values of volume (1,625 and 7,210 discharges per year, respectively))                                                                                                          |
| Ownership                                                   | Indicator variable for government or private ownership<br>(public, private not-for-profit, private investor-owned)                                                                                                                                                                                       |
| Status                                                      | Categorical variable for teaching status and metropolitan area location<br>(metropolitan teaching, metropolitan non-teaching, non-metropolitan)                                                                                                                                                          |
| <u>Hospitalization controls</u><br>(during index admission) |                                                                                                                                                                                                                                                                                                          |
| Planned                                                     | Indicator variable for planned admission                                                                                                                                                                                                                                                                 |
| Emergency department                                        | Indicator variable for emergency department service                                                                                                                                                                                                                                                      |
| Operating room                                              | Indicator variable for a major operating room procedure                                                                                                                                                                                                                                                  |
| Severity                                                    | Categorical variable for severity of illness<br>(no class specified, minor, moderate, major, extreme)                                                                                                                                                                                                    |
| Mortality risk                                              | Categorical variable for mortality risk<br>(no class specified, minor, moderate, major, extreme)                                                                                                                                                                                                         |
| Same day event                                              | Categorical variable for multiple discharges in a single day<br>(no event, two transfers from different hospitals, two discharges at different hospitals, two discharges at the same hospital, more than two discharges)                                                                                 |
| Disposition                                                 | Categorical variable for discharge disposition<br>(routine, transfer to short-term hospital, other transfers, home health care, unknown)                                                                                                                                                                 |
| Primary condition                                           | Categorical variable for the primary condition using CCS codes                                                                                                                                                                                                                                           |
| <u>Time controls</u>                                        |                                                                                                                                                                                                                                                                                                          |
| Weekend                                                     | Indicator variable for index admission during weekend                                                                                                                                                                                                                                                    |
| Discharge month                                             | Categorical variable for discharge month for index admission                                                                                                                                                                                                                                             |

Table A2 30-day Readmissions Change after HRRP Implementation – All Coefficients

| Effect:                                                                         | (1)        |          | (2)                        |          | (3)                        |          |
|---------------------------------------------------------------------------------|------------|----------|----------------------------|----------|----------------------------|----------|
|                                                                                 | Main       |          | Spillover across condition |          | Spillover across insurance |          |
| <i>TCohort</i>                                                                  | 0.0307***  | (0.0012) | 0.0158***                  | (0.0007) | -0.0007                    | (0.0012) |
| <i>Post</i>                                                                     | -0.0019*** | (0.0005) | -0.0019***                 | (0.0005) | -0.0019***                 | (0.0005) |
| <i>TCohort × Post</i>                                                           | -0.0116*** | (0.0010) | -0.0052***                 | (0.0007) | -0.0037***                 | (0.0010) |
| <u>Patient controls</u>                                                         |            |          |                            |          |                            |          |
| <i>Age</i> (18-44 – reference)                                                  |            |          |                            |          |                            |          |
| 0                                                                               | -0.0101*** | (0.0019) | -0.0106***                 | (0.0018) | -0.0109***                 | (0.0018) |
| 1-17                                                                            | -0.0102*** | (0.0009) | -0.0112***                 | (0.0009) | -0.0116***                 | (0.0009) |
| 45-64                                                                           | 0.0024***  | (0.0003) | 0.0028***                  | (0.0003) | 0.0027***                  | (0.0003) |
| 65-74                                                                           | 0.0083***  | (0.0006) | 0.0075***                  | (0.0006) | 0.0081***                  | (0.0006) |
| 75-89                                                                           | -0.0026**  | (0.0008) | -0.0013+                   | (0.0006) | 0.0045***                  | (0.0009) |
| 90+                                                                             | -0.0270*** | (0.0011) | -0.0175***                 | (0.0008) | -0.0138***                 | (0.0021) |
| <i>Gender</i> (Female – reference)                                              |            |          |                            |          |                            |          |
| Male                                                                            | 0.0003     | (0.0002) | 0.0041***                  | (0.0002) | -0.0004                    | (0.0002) |
| <i>Location</i> (Central counties of areas of $\geq 1m$ population – reference) |            |          |                            |          |                            |          |
| Fringe counties of areas of $\geq 1m$ population                                | 0.0011*    | (0.0004) | 0.0001                     | (0.0005) | 0.0013**                   | (0.0004) |
| Metro areas of 250,000-999,999 population                                       | -0.0041*** | (0.0006) | -0.0092***                 | (0.0007) | -0.0023***                 | (0.0005) |
| Metro areas of 50,000-249,999 population                                        | -0.0059*** | (0.0007) | -0.0101***                 | (0.0007) | -0.0041***                 | (0.0006) |
| Metropolitan                                                                    | -0.0082*** | (0.0007) | -0.0142***                 | (0.0007) | -0.0053***                 | (0.0007) |
| Not metropolitan or micropolitan                                                | -0.0106*** | (0.0007) | -0.0171***                 | (0.0008) | -0.0072***                 | (0.0007) |
| <i>Resident</i> (Resident – reference)                                          |            |          |                            |          |                            |          |
| Nonresident                                                                     | -0.0255*** | (0.0007) | -0.0305***                 | (0.0007) | -0.0226***                 | (0.0007) |
| <i>Income</i> (4th quartile – reference)                                        |            |          |                            |          |                            |          |
| 1st quartile                                                                    | 0.0076***  | (0.0005) | 0.0099***                  | (0.0005) | 0.0049***                  | (0.0005) |
| 2nd quartile                                                                    | 0.0044***  | (0.0004) | 0.0054***                  | (0.0004) | 0.0034***                  | (0.0004) |
| 3rd quartile                                                                    | 0.0020***  | (0.0003) | 0.0023***                  | (0.0003) | 0.0017***                  | (0.0003) |
| <u>Hospital controls</u>                                                        |            |          |                            |          |                            |          |
| <i>Volume</i> (Small – reference)                                               |            |          |                            |          |                            |          |
| Medium                                                                          | -0.0069*** | (0.0008) | -0.0054***                 | (0.0004) | -0.0034***                 | (0.0004) |
| Large                                                                           | -0.0106*** | (0.0009) | -0.0092***                 | (0.0009) | -0.0077***                 | (0.0009) |
| <i>Ownership</i> (Private, not-for-profit – reference)                          |            |          |                            |          |                            |          |
| Public                                                                          | 0.0029***  | (0.0008) | 0.0026**                   | (0.0008) | 0.0028***                  | (0.0008) |
| Private, investor-owned                                                         | 0.0032***  | (0.0006) | 0.0053***                  | (0.0007) | 0.0014**                   | (0.0005) |
| <i>Status</i> (Metropolitan teaching – reference)                               |            |          |                            |          |                            |          |
| Metropolitan non-teaching                                                       | -0.0020*** | (0.0005) | -0.0030***                 | (0.0006) | -0.0024***                 | (0.0005) |
| Non-metropolitan                                                                | -0.0011    | (0.0008) | -0.0024*                   | (0.0009) | -0.0015†                   | (0.0008) |
| <u>Hospitalization controls</u>                                                 |            |          |                            |          |                            |          |
| <i>Planned</i> (Not-planned – reference)                                        |            |          |                            |          |                            |          |
| Planned                                                                         | -0.0229*** | (0.0004) | -0.0256***                 | (0.0004) | -0.0229***                 | (0.0005) |
| <i>Emergency department</i> (Not visited – reference)                           |            |          |                            |          |                            |          |
| Visited                                                                         | 0.0051***  | (0.0004) | 0.0047***                  | (0.0004) | 0.0032***                  | (0.0004) |
| <i>Operating room</i> (No procedure – reference)                                |            |          |                            |          |                            |          |
| Major procedure                                                                 | -0.0147*** | (0.0003) | -0.0107***                 | (0.0003) | -0.0149***                 | (0.0003) |

Table A2 30-day Readmissions Change after HRRP Implementation – All Coefficients (continued)

| Effect:                                      | (1)                    |                        | (2)                        |  | (3)                        |  |
|----------------------------------------------|------------------------|------------------------|----------------------------|--|----------------------------|--|
|                                              | Main                   |                        | Spillover across condition |  | Spillover across insurance |  |
| <b>Hospitalization controls</b>              |                        |                        |                            |  |                            |  |
| <i>Severity</i> (Moderate – reference)       |                        |                        |                            |  |                            |  |
| No class specified                           |                        |                        |                            |  |                            |  |
| Minor                                        | 0.0050<br>(0.0089)     | 0.0104<br>(0.0087)     | 0.0009<br>(0.0086)         |  |                            |  |
| Major                                        | -0.0127***<br>(0.0002) | -0.0136***<br>(0.0002) | -0.0121***<br>(0.0002)     |  |                            |  |
| Extreme                                      | 0.0251***<br>(0.0004)  | 0.0295***<br>(0.0003)  | 0.0237***<br>(0.0004)      |  |                            |  |
| <i>Mortality risk</i> (Moderate – reference) |                        |                        |                            |  |                            |  |
| Minor                                        | 0.0504***<br>(0.0010)  | 0.0593***<br>(0.0007)  | 0.0498***<br>(0.0012)      |  |                            |  |
| Major                                        | -0.0367***<br>(0.0005) | -0.0346***<br>(0.0003) | -0.0371***<br>(0.0005)     |  |                            |  |
| Extreme                                      | 0.0236***<br>(0.0005)  | 0.0205***<br>(0.0003)  | 0.0226***<br>(0.0007)      |  |                            |  |
| <i>Same day event</i> (No event – reference) |                        |                        |                            |  |                            |  |
| Two transfers from different hospitals       | 0.0088***<br>(0.0010)  | 0.0091***<br>(0.0007)  | 0.0021<br>(0.0013)         |  |                            |  |
| Two discharges at different hospitals        | 0.0209***<br>(0.0015)  | 0.0252***<br>(0.0013)  | 0.0203***<br>(0.0016)      |  |                            |  |
| Two discharges at the same hospital          | 0.0048***<br>(0.0014)  | 0.0018†<br>(0.0010)    | 0.0041**<br>(0.0014)       |  |                            |  |
| More than two discharges                     | -0.0125***<br>(0.0012) | -0.0125***<br>(0.0008) | -0.0159***<br>(0.0014)     |  |                            |  |
| <i>Disposition</i> (Routine – reference)     |                        |                        |                            |  |                            |  |
| Transfer to short-term hospital              | 0.0259***<br>(0.0028)  | 0.0272***<br>(0.0018)  | 0.0264***<br>(0.0030)      |  |                            |  |
| Other transfers                              | 0.0473***<br>(0.0019)  | 0.0506***<br>(0.0020)  | 0.0512***<br>(0.0019)      |  |                            |  |
| Home health care                             | 0.0453***<br>(0.0007)  | 0.0412***<br>(0.0005)  | 0.0429***<br>(0.0009)      |  |                            |  |
| Unknown                                      | 0.0410***<br>(0.0006)  | 0.0391***<br>(0.0004)  | 0.0418***<br>(0.0007)      |  |                            |  |
| <i>Time controls</i>                         |                        |                        |                            |  |                            |  |
| <i>Weekend</i> (Monday-Friday – reference)   |                        |                        |                            |  |                            |  |
| Saturday-Sunday                              | -0.1036***<br>(0.0047) | -0.1090***<br>(0.0034) | -0.0948***<br>(0.0058)     |  |                            |  |
| <i>Discharge month</i> (January – reference) |                        |                        |                            |  |                            |  |
| February                                     | -0.0010***<br>(0.0002) | -0.0011***<br>(0.0002) | -0.0015***<br>(0.0002)     |  |                            |  |
| March                                        | 0.0003<br>(0.0003)     | -0.0006†<br>(0.0003)   | -0.0001<br>(0.0003)        |  |                            |  |
| April                                        | -0.0010**<br>(0.0003)  | -0.0015***<br>(0.0003) | -0.0008*<br>(0.0003)       |  |                            |  |
| May                                          | -0.0004<br>(0.0003)    | -0.0015***<br>(0.0003) | 0.0001<br>(0.0003)         |  |                            |  |
| June                                         | -0.0002<br>(0.0003)    | -0.0011***<br>(0.0003) | 0.0000<br>(0.0003)         |  |                            |  |
| July                                         | -0.0009**<br>(0.0004)  | -0.0020**<br>(0.0003)  | -0.0006<br>(0.0003)        |  |                            |  |
| August                                       | 0.0008*<br>(0.0003)    | -0.0007*<br>(0.0003)   | 0.0008*<br>(0.0003)        |  |                            |  |
| September                                    | 0.0011**<br>(0.0004)   | -0.0008*<br>(0.0003)   | 0.0010**<br>(0.0003)       |  |                            |  |
| October                                      | 0.0000<br>(0.0004)     | -0.0025***<br>(0.0003) | 0.0000<br>(0.0003)         |  |                            |  |
| Constant                                     | -0.0004<br>(0.0004)    | -0.0025***<br>(0.0003) | -0.0003<br>(0.0004)        |  |                            |  |
| Treatment cohort                             | 0.0887***<br>(0.0015)  | 0.0933***<br>(0.0014)  | 0.0959***<br>(0.0015)      |  |                            |  |
| Control cohort                               | A                      | B                      | C                          |  |                            |  |
| Observations                                 | D                      | D                      | D                          |  |                            |  |
|                                              | 13,366,960             | 23,538,191             | 12,060,288                 |  |                            |  |

Notes. Estimates are from linear regression models. All models include all controls in Equation (1), including condition fixed effects. Robust standard errors clustered by hospital-year in parentheses.

†  $p < 0.10$ ; \*  $p < 0.05$ ; \*\*  $p < 0.01$ ; \*\*\*  $p < 0.001$ .

**Table A3 Care Intensity Measure Means of Hospital Admissions**

|                                 | (1)       | (2)       | (3)      | (4)       | (5)        |
|---------------------------------|-----------|-----------|----------|-----------|------------|
|                                 | Cohort A  | Cohort B  | Cohort C | Cohort D  | Overall    |
| <i>Length of stay (days)</i>    |           |           |          |           |            |
| 2011                            | 5.41      | 5.26      | 4.57     | 3.69      | 4.50       |
| 2012                            | 5.33      | 5.22      | 4.49     | 3.70      | 4.49       |
| 2013                            | 5.22      | 5.21      | 4.45     | 3.68      | 4.48       |
| 2014                            | 5.13      | 5.30      | 4.39     | 3.75      | 4.54       |
| Pre-HRRP (Jan 2011 - Sep 2012)  | 5.37      | 5.24      | 4.53     | 3.69      | 4.49       |
| Post-HRRP (Oct 2012 - Oct 2014) | 5.19      | 5.26      | 4.43     | 3.72      | 4.51       |
| <i>Number of procedures</i>     |           |           |          |           |            |
| 2011                            | 1.73      | 1.73      | 3.00     | 1.90      | 1.84       |
| 2012                            | 1.81      | 1.73      | 3.17     | 1.93      | 1.86       |
| 2013                            | 1.81      | 1.74      | 3.27     | 1.92      | 1.86       |
| 2014                            | 1.80      | 1.69      | 3.26     | 1.89      | 1.82       |
| Pre-HRRP (Jan 2011 - Sep 2012)  | 1.76      | 1.73      | 3.08     | 1.92      | 1.85       |
| Post-HRRP (Oct 2012 - Oct 2014) | 1.81      | 1.71      | 3.26     | 1.90      | 1.84       |
| <i>Cost (\$)</i>                |           |           |          |           |            |
| 2011                            | 12,293    | 11,898    | 15,059   | 9,231     | 10,716     |
| 2012                            | 12,113    | 11,836    | 14,962   | 9,215     | 10,686     |
| 2013                            | 11,833    | 11,774    | 14,880   | 8,928     | 10,514     |
| 2014                            | 11,059    | 11,395    | 14,094   | 8,565     | 10,095     |
| Pre-HRRP (Jan 2011 - Sep 2012)  | 12,190    | 11,840    | 15,012   | 9,208     | 10,680     |
| Post-HRRP (Oct 2012 - Oct 2014) | 11,495    | 11,618    | 14,508   | 8,781     | 10,339     |
| Observations                    | 1,143,429 | 8,208,826 | 345,984  | 8,747,107 | 18,445,346 |

Notes. Each observation is a hospitalization. Data are limited to first visits in a 30-day time window. Cost is inflation-adjusted and is shown in 2011 U.S. dollars.

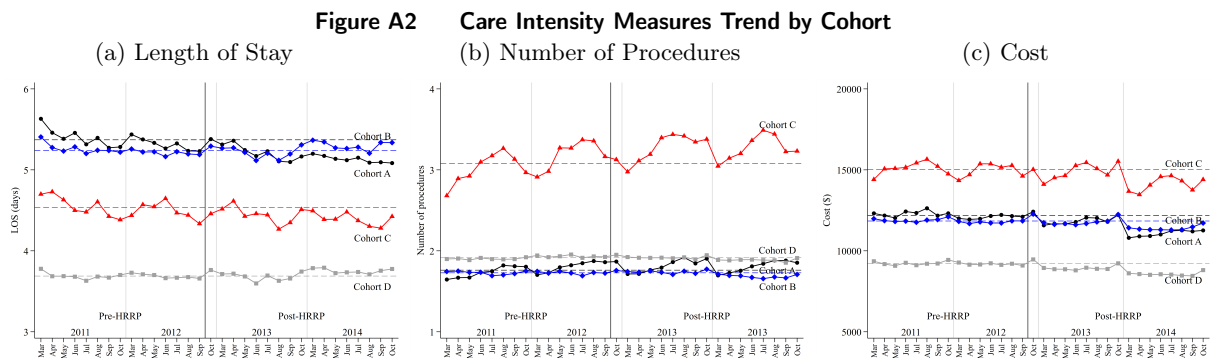

Notes. Dashed lines show average value for each cohort-metric in 2011-2012.  
 Cohort A: Medicare, target conditions; Cohort B: Medicare, non-target conditions; Cohort C: private insurance, target condition;  
 Cohort D: private insurance, non-target conditions.

**Table A4 Robustness: 30-day Readmissions Change after HRRP Implementation (Probit & Logit)**

| <i>Effect:</i>                      | (1)                    | (2)                    | (3)                    | (4)                    | (5)                    | (6)                    |
|-------------------------------------|------------------------|------------------------|------------------------|------------------------|------------------------|------------------------|
|                                     | Probit                 |                        |                        | Logit                  |                        |                        |
|                                     | Main                   | Spillover across       |                        | Main                   | Spillover across       |                        |
|                                     |                        | Condition              | Insurance              |                        | Condition              | Insurance              |
| <i>TCohort</i>                      | 0.1107***<br>(0.0054)  | 0.0694***<br>(0.0034)  | -0.0124*<br>(0.0063)   | 0.1978***<br>(0.0100)  | 0.1263***<br>(0.0065)  | -0.0284*<br>(0.0121)   |
| <i>Post</i>                         | -0.0171***<br>(0.0040) | -0.0140***<br>(0.0043) | -0.0175***<br>(0.0040) | -0.0338***<br>(0.0083) | -0.0270**<br>(0.0088)  | -0.0348***<br>(0.0082) |
| <i>TCohort</i> × <i>Post</i>        | -0.0334***<br>(0.0047) | -0.0168***<br>(0.0038) | -0.0159**<br>(0.0060)  | -0.0563***<br>(0.0091) | -0.0302***<br>(0.0077) | -0.0298**<br>(0.0115)  |
| Marginal effect on treatment cohort | -0.0114***<br>(0.0010) | -0.0053***<br>(0.0006) | -0.0038***<br>(0.0010) | -0.0115***<br>(0.0010) | -0.0054***<br>(0.0006) | -0.0040***<br>(0.0010) |
| Treatment cohort                    | A                      | B                      | C                      | A                      | B                      | C                      |
| Control cohort                      | D                      | D                      | D                      | D                      | D                      | D                      |
| Observations                        | 13,366,960             | 23,538,191             | 12,060,288             | 13,366,960             | 23,538,191             | 12,060,288             |

*Notes.* The marginal effects shown are the mean marginal effect over all observations. All models include all controls in Equation (1), including condition fixed effects. Robust standard errors clustered by hospital-year in parentheses. †  $p < 0.10$ ; \*  $p < 0.05$ ; \*\*  $p < 0.01$ ; \*\*\*  $p < 0.001$ .

**Table A5 Robustness: 30-day Readmissions Change after HRRP Implementation (DDD Model)**

|                                                    | (1)                    |
|----------------------------------------------------|------------------------|
| <i>Medicare</i>                                    | 0.0141***<br>(0.0007)  |
| <i>Target</i>                                      | -0.0084***<br>(0.0010) |
| <i>Post</i>                                        | -0.0017***<br>(0.0005) |
| <i>Medicare</i> × <i>Target</i>                    | 0.0223***<br>(0.0009)  |
| <i>Medicare</i> × <i>Post</i> (Effect on Cohort B) | -0.0052***<br>(0.0007) |
| <i>Target</i> × <i>Post</i> (Effect on Cohort C)   | -0.0043***<br>(0.0011) |
| <i>Medicare</i> × <i>Target</i> × <i>Post</i>      | -0.0018<br>(0.0012)    |
| Total Effect on Cohort A                           | -0.0113***<br>(0.0010) |
| Treatment cohort                                   | A                      |
| Spillover cohorts                                  | B and C                |
| Control cohort                                     | D                      |
| Observations                                       | 25,834,053             |

*Notes.* Estimates are from linear regression models. All models include all controls in Equation (1), including condition fixed effects. Robust standard errors clustered by hospital-year in parentheses. †  $p < 0.10$ ; \*  $p < 0.05$ ; \*\*  $p < 0.01$ ; \*\*\*  $p < 0.001$ .

**Table A6 Robustness: 30-day Readmissions Change after HRRP Implementation (with hospital-year FE)**

| <i>Effect:</i>               | (1)                    | (2)                    | (3)                    |
|------------------------------|------------------------|------------------------|------------------------|
|                              | Main                   | Spillover across       |                        |
|                              |                        | Condition              | Insurance              |
| <i>TCohort</i>               | 0.0294***<br>(0.0012)  | 0.0151***<br>(0.0006)  | -0.0016<br>(0.0012)    |
| <i>Post</i>                  | -0.0001<br>(0.0006)    | 0.0015*<br>(0.0006)    | -0.0018**<br>(0.0006)  |
| <i>TCohort</i> × <i>Post</i> | -0.0113***<br>(0.0010) | -0.0051***<br>(0.0006) | -0.0034***<br>(0.0010) |
| Treatment cohort             | A                      | B                      | C                      |
| Control cohort               | D                      | D                      | D                      |
| Observations                 | 13,366,960             | 23,538,191             | 12,060,288             |

*Notes.* Estimates are from linear regression models. All models include all controls in Equation (1), including condition fixed effects, in addition to hospital-year fixed effects. Robust standard errors clustered by hospital-year in parentheses. † $p < 0.10$ ; \* $p < 0.05$ ; \*\* $p < 0.01$ ; \*\*\* $p < 0.001$ .

**Table A7 Robustness: 30-day Readmissions Change after HRRP Implementation (with matched conditions in treatment and control cohorts)**

| <i>Effect:</i>               | (1)                   | (2)                    |
|------------------------------|-----------------------|------------------------|
|                              | Main                  | Spillover across       |
|                              |                       | insurance              |
| <i>TCohort</i>               | 0.0005<br>(0.0067)    | -0.0316***<br>(0.0042) |
| <i>Post</i>                  | 0.0033<br>(0.0055)    | 0.0002<br>(0.0021)     |
| <i>TCohort</i> × <i>Post</i> | -0.0159**<br>(0.0055) | -0.0060**<br>(0.0021)  |
| Treatment cohort             | A                     | C                      |
| Control cohort               | D                     | D                      |
| Observations                 | 1,827,028             | 600,713                |

*Notes.* Estimates are from linear regression models. All models include all controls in Equation (1), including condition fixed effects. Robust standard errors clustered by hospital-year in parentheses. Cohort D in column (1) is limited to cancer of pancreas, pathological fracture, and unspecified cancer, and in column (2) is limited to digestive congenital anomalies, unspecified cancer, and urinary tract infections. † $p < 0.10$ ; \* $p < 0.05$ ; \*\* $p < 0.01$ ; \*\*\* $p < 0.001$ .

**Table A8 Robustness: HRRP Impact on 30-day Readmissions by Age Subgroups**

| <i>Effect:</i>               | (1)                    | (2)                    | (3)                    | (4)                    | (5)                    | (6)                    | (7)                    | (8)                    | (9)                    |
|------------------------------|------------------------|------------------------|------------------------|------------------------|------------------------|------------------------|------------------------|------------------------|------------------------|
|                              | Main                   | Spillover across       |                        | Main                   | Spillover across       |                        | Main                   | Spillover across       |                        |
|                              |                        | Condition              | Insurance              |                        | Condition              | Insurance              |                        | Condition              | Insurance              |
| <i>TCohort</i>               | 0.0296***<br>(0.0013)  | 0.0152***<br>(0.0007)  | 0.0030*<br>(0.0014)    | 0.0282***<br>(0.0013)  | 0.0152***<br>(0.0007)  | 0.0042**<br>(0.0015)   | 0.0268***<br>(0.0016)  | 0.0149***<br>(0.0007)  | 0.0060**<br>(0.0021)   |
| <i>Post</i>                  | -0.0028***<br>(0.0007) | -0.0026***<br>(0.0007) | -0.0028***<br>(0.0007) | -0.0030***<br>(0.0007) | -0.0028***<br>(0.0007) | -0.0030***<br>(0.0007) | -0.0035***<br>(0.0009) | -0.0033***<br>(0.0009) | -0.0035***<br>(0.0008) |
| <i>TCohort</i> × <i>Post</i> | -0.0105***<br>(0.0011) | -0.0043***<br>(0.0007) | -0.0036**<br>(0.0011)  | -0.0102***<br>(0.0011) | -0.0040***<br>(0.0007) | -0.0039**<br>(0.0013)  | -0.0095***<br>(0.0011) | -0.0034***<br>(0.0008) | -0.0048**<br>(0.0017)  |
| Treatment cohort             | A                      | B                      | C                      | A                      | B                      | C                      | A                      | B                      | C                      |
| Control cohort               | D                      | D                      | D                      | D                      | D                      | D                      | D                      | D                      | D                      |
| Observations                 | 7,588,555              | 17,759,786             | 6,221,510              | 5,965,807              | 16,137,038             | 4,529,016              | 3,818,878              | 13,990,109             | 2,226,437              |

*Notes.* Estimates are from linear regression models. All models include all controls in Equation (1), including condition fixed effects. Robust standard errors clustered by hospital-year in parentheses. † $p < 0.10$ ; \* $p < 0.05$ ; \*\* $p < 0.01$ ; \*\*\* $p < 0.001$ .

**Table A9 31-60-day Readmissions Change after HRRP Implementation**

| <i>Effect:</i>               | (1)                    | (2)                    | (3)                              |
|------------------------------|------------------------|------------------------|----------------------------------|
|                              | Main                   | Spillover across       |                                  |
|                              |                        | Condition              | Insurance                        |
| <i>TCohort</i>               | 0.0147***<br>(0.0007)  | 0.0097***<br>(0.0003)  | 0.0014*<br>(0.0007)              |
| <i>Post</i>                  | 0.0002<br>(0.0002)     | 0.0014***<br>(0.0002)  | -0.0003 <sup>†</sup><br>(0.0002) |
| <i>TCohort</i> × <i>Post</i> | -0.0079***<br>(0.0005) | -0.0050***<br>(0.0003) | -0.0025***<br>(0.0006)           |
| Treatment cohort             | A                      | B                      | C                                |
| Control cohort               | D                      | D                      | D                                |
| Observations                 | 13,366,960             | 23,538,191             | 12,060,288                       |

*Notes.* Estimates are from linear regression models. All models include all controls in Equation (1), including condition fixed effects. Robust standard errors clustered by hospital-year in parentheses. <sup>†</sup> $p < 0.10$ ; \* $p < 0.05$ ; \*\* $p < 0.01$ ; \*\*\* $p < 0.001$ .
